# Supplementary material
Source: PubMed Central journal article supplement (PMC3309609)
Supplement: jf204777m_si_001.pdf [file jf204777m_si_001.pdf]

Supporting information: Results of the quantitative determination of substances by NMR

| Brand            | Sample <sup>1</sup> | Caffeine<br>(mg/L) | Acesulfame<br>-K (mg/L) | Aspartame <sup>2</sup><br>(mg/L) | Cyclamate<br>(mg/L) | Benzoate<br>(mg/L) | E<br>150D<br>(g/L) | HMF<br>(mg/L) | Vanillin<br>(mg/L) |
|------------------|---------------------|--------------------|-------------------------|----------------------------------|---------------------|--------------------|--------------------|---------------|--------------------|
| Brand 1          | Sample 1 G          | 98                 | ND                      | ND                               | ND                  | ND                 | 2.14               | 4.9           | ND                 |
|                  | Sample 2 G          | 96                 | ND                      | ND                               | ND                  | ND                 | 2.05               | 3.9           | ND                 |
|                  | Sample 3 F          | 95                 | ND                      | ND                               | ND                  | ND                 | 2.68               | 4.9           | ND                 |
|                  | Sample 4 F          | 106                | ND                      | ND                               | ND                  | ND                 | 1.95               | 5.8           | ND                 |
|                  | Sample 5 F          | 105                | ND                      | ND                               | ND                  | ND                 | 2.05               | 5.8           | ND                 |
|                  | Sample 6 F          | 101                | ND                      | ND                               | ND                  | ND                 | 2.09               | 5.8           | ND                 |
|                  | Sample 7 F          | 103                | ND                      | ND                               | ND                  | ND                 | 1.86               | 5.8           | ND                 |
|                  | Sample 8 F          | 96                 | ND                      | ND                               | ND                  | ND                 | 2.55               | 4.9           | ND                 |
|                  | Sample 9 F          | 105                | ND                      | ND                               | ND                  | ND                 | 1.91               | 4.9           | ND                 |
|                  | Sample 10 G         | 100                | ND                      | ND                               | ND                  | ND                 | 2.05               | 3.9           | ND                 |
|                  | Sample 11 G         | 100                | ND                      | ND                               | ND                  | ND                 | 2.05               | 3.9           | ND                 |
|                  | Sample 12 G         | 100                | ND                      | ND                               | ND                  | ND                 | 2.18               | 3.9           | ND                 |
|                  | Sample 13 G         | 99                 | ND                      | ND                               | ND                  | ND                 | 2.00               | 3.9           | ND                 |
|                  | Sample 14 G         | 103                | ND                      | ND                               | ND                  | ND                 | 3.05               | 3.9           | ND                 |
|                  | Sample 15 G         | 104                | ND                      | ND                               | ND                  | ND                 | 2.27               | 2.9           | ND                 |
|                  | Sample 16 G         | 104                | ND                      | ND                               | ND                  | ND                 | 2.09               | 4.9           | ND                 |
|                  | Sample 17 G         | 99                 | ND                      | ND                               | ND                  | ND                 | 2.14               | 3.9           | ND                 |
| Brand 1<br>light | Sample 1 F          | 125                | 158                     | 243                              | ND                  | ND                 | 2.32               | 3.9           | ND                 |
|                  | Sample 2 F          | 124                | 158                     | 249                              | ND                  | ND                 | 1.64               | 3.9           | ND                 |
|                  | Sample 3 F          | 124                | 160                     | 249                              | ND                  | ND                 | 1.68               | 3.9           | ND                 |
|                  | Sample 4 F          | 126                | 160                     | 255                              | ND                  | ND                 | 1.68               | 3.9           | ND                 |
|                  | Sample 5 F          | 125                | 160                     | 255                              | ND                  | ND                 | 1.73               | 3.9           | ND                 |
|                  | Sample 6 F          | 125                | 156                     | 249                              | ND                  | ND                 | 1.68               | 3.9           | ND                 |
|                  | Sample 7 G          | 130                | 156                     | 146                              | 254                 | ND                 | 2.00               | 3.9           | ND                 |
|                  | Sample 8 G          | 125                | 154                     | 143                              | 254                 | ND                 | 1.86               | 3.9           | ND                 |
|                  | Sample 9 G          | 129                | 153                     | 153                              | 254                 | ND                 | 2.23               | 2.9           | ND                 |
|                  | Sample 10 G         | 133                | 153                     | 146                              | 260                 | ND                 | 2.00               | 3.9           | ND                 |
|                  | Sample 11 G         | 121                | 156                     | 156                              | 244                 | ND                 | 2.91               | 1.0           | ND                 |
| Brand 1<br>zero  | Sample 1 F          | 98                 | 44                      | 430                              | ND                  | ND                 | 1.82               | 3.9           | ND                 |
|                  | Sample 2 F          | 96                 | 41                      | 423                              | ND                  | ND                 | 1.86               | 2.9           | ND                 |
|                  | Sample 3 F          | 98                 | 43                      | 419                              | ND                  | ND                 | 1.95               | 2.9           | ND                 |
|                  | Sample 4 F          | 96                 | 44                      | 416                              | ND                  | ND                 | 1.91               | 2.9           | ND                 |
|                  | Sample 5 F          | 96                 | 44                      | 427                              | ND                  | ND                 | 1.95               | 2.9           | ND                 |
|                  | Sample 6 F          | 94                 | 41                      | 434                              | ND                  | ND                 | 1.95               | 2.9           | ND                 |
|                  | Sample 7 F          | 99                 | 41                      | Overlap                          | 250                 | ND                 | 2.09               | 2.9           | ND                 |
|                  | Sample 8 G          | 100                | 164                     | Overlap                          | 247                 | ND                 | 3.00               | ND            | ND                 |

|                                |             |     |     |         |              |     |      |     |      |
|--------------------------------|-------------|-----|-----|---------|--------------|-----|------|-----|------|
|                                | Sample 9 G  | 94  | 150 | Overlap | 247          | ND  | 1.55 | 3.9 | ND   |
|                                | Sample 10 G | 90  | 146 | Overlap | 247          | ND  | 1.55 | 2.9 | ND   |
|                                | Sample 11 G | 89  | 148 | Overlap | 255          | ND  | 1.91 | 2.9 | ND   |
|                                | Sample 12 G | 99  | 155 | Overlap | 247          | ND  | 2.14 | 4.9 | ND   |
|                                | Sample 13 G | 98  | 148 | Overlap | Interference | ND  | 2.14 | 3.9 | ND   |
| Brand 1 without caffeine       | Sample 1 F  | ND  | ND  | ND      | ND           | ND  | 1.82 | 3.9 | ND   |
| Brand 1 light without caffeine | Sample 1 F  | ND  | 170 | 224     | ND           | ND  | 1.82 | 2.9 | ND   |
|                                | Sample 2 F  | ND  | 166 | 255     | ND           | ND  | 2.05 | 3.9 | ND   |
|                                | Sample 3 F  | ND  | 168 | 231     | ND           | ND  | 1.86 | 2.9 | ND   |
|                                | Sample 4 F  | ND  | 156 | 237     | ND           | ND  | 1.99 | 3.9 | ND   |
|                                | Sample 5 F  | ND  | 156 | 237     | ND           | ND  | 1.99 | 2.9 | ND   |
| Brand 1 Vanilla                | Sample 1 G  | 105 | ND  | ND      | ND           | ND  | 2.91 | 1.9 | 16.3 |
|                                | Sample 2 G  | 103 | ND  | ND      | ND           | ND  | 3.14 | 1.0 | 17.3 |
| Brand 2                        | Sample 1 F  | 108 | ND  | ND      | ND           | ND  | 1.27 | 1.9 | ND   |
|                                | Sample 2 G  | 104 | ND  | ND      | ND           | ND  | 1.82 | 1.9 | ND   |
|                                | Sample 3 G  | 113 | ND  | ND      | ND           | ND  | 1.45 | 1.9 | ND   |
|                                | Sample 4 G  | 108 | ND  | ND      | ND           | ND  | 1.45 | 1.9 | ND   |
|                                | Sample 5 G  | 111 | ND  | ND      | ND           | ND  | 1.41 | 1.9 | ND   |
|                                | Sample 6 G  | 113 | ND  | ND      | ND           | ND  | 1.68 | 2.9 | ND   |
|                                | Sample 7 G  | 113 | ND  | ND      | ND           | ND  | 1.23 | 2.9 | ND   |
|                                | Sample 8 G  | 113 | ND  | ND      | ND           | ND  | 1.68 | 1.9 | ND   |
|                                | Sample 9 G  | 111 | ND  | ND      | ND           | ND  | 1.86 | 2.9 | ND   |
|                                | Sample 10 G | 113 | ND  | ND      | ND           | ND  | 1.50 | 1.9 | ND   |
| Brand 2 light                  | Sample 1 G  | 125 | 93  | Overlap | ND           | 143 | 1.32 | 1.9 | ND   |
|                                | Sample 2 G  | 123 | 94  | Overlap | ND           | 145 | 1.32 | 1.9 | ND   |
|                                | Sample 3 G  | 129 | 93  | Overlap | ND           | 143 | 1.27 | 1.9 | ND   |
|                                | Sample 4 G  | 130 | 93  | Overlap | ND           | 145 | 1.27 | 1.9 | ND   |
|                                | Sample 5 G  | 126 | 98  | Overlap | ND           | 151 | 1.32 | 1.9 | ND   |
|                                | Sample 6 G  | 126 | 96  | Overlap | ND           | 149 | 1.14 | 1.9 | ND   |
|                                | Sample 7 G  | 131 | 93  | Overlap | ND           | 148 | 1.27 | 1.9 | ND   |
|                                | Sample 8 G  | 139 | 96  | Overlap | ND           | 149 | 1.32 | 1.9 | ND   |
| Brand 2 zero                   | Sample 1 F  | 130 | 41  | 601     | ND           | ND  | 2.23 | 1.9 | ND   |
| Brand 3 discount               | Sample 1 F  | 116 | ND  | ND      | ND           | ND  | 2.36 | 1.9 | ND   |
|                                | Sample 2 F  | 114 | ND  | ND      | ND           | ND  | 1.82 | 1.9 | ND   |
|                                | Sample 3 F  | 119 | ND  | ND      | ND           | ND  | 2.32 | 1.9 | ND   |
|                                | Sample 4 F  | 124 | ND  | ND      | ND           | ND  | 2.14 | 1.9 | ND   |
|                                | Sample 5 F  | 136 | ND  | ND      | ND           | ND  | 1.95 | 1.9 | ND   |

|                        |            |     |     |         |     |     |      |     |    |
|------------------------|------------|-----|-----|---------|-----|-----|------|-----|----|
|                        | Sample 6 F | 115 | ND  | ND      | ND  | ND  | 2.59 | 1.9 | ND |
|                        | Sample 7 F | 115 | ND  | ND      | ND  | ND  | 2.64 | 1.9 | ND |
| Brand 4 discount       | Sample 1 G | 69  | ND  | ND      | ND  | ND  | 2.50 | 1.9 | ND |
|                        | Sample 2 G | 71  | ND  | ND      | ND  | ND  | 2.18 | 1.0 | ND |
|                        | Sample 3 G | 71  | ND  | ND      | ND  | ND  | 2.18 | 1.9 | ND |
|                        | Sample 4 G | 73  | ND  | ND      | ND  | ND  | 2.23 | 1.0 | ND |
|                        | Sample 5 G | 74  | ND  | ND      | ND  | ND  | 2.27 | 1.0 | ND |
| Brand 4 discount zero  | Sample 1 G | 63  | 104 | 168     | 278 | ND  | 1.55 | 2.9 | ND |
|                        | Sample 2 G | 61  | 88  | 137     | 230 | ND  | 1.55 | 1.0 | ND |
|                        | Sample 3 G | 63  | 96  | 115     | 225 | ND  | 1.45 | 1.0 | ND |
|                        | Sample 4 G | 61  | 89  | 134     | 228 | ND  | 1.50 | 1.0 | ND |
|                        | Sample 5 G | 65  | 91  | 137     | 231 | ND  | 1.59 | 1.0 | ND |
| Brand 5 discount       | Sample 1 F | 86  | ND  | ND      | ND  | ND  | 1.27 | 4.9 | ND |
|                        | Sample 2 F | 86  | ND  | ND      | ND  | ND  | 1.32 | 3.9 | ND |
|                        | Sample 3 F | 84  | ND  | ND      | ND  | ND  | 1.50 | 4.9 | ND |
|                        | Sample 4 F | 91  | ND  | ND      | ND  | ND  | 1.18 | 5.8 | ND |
|                        | Sample 5 F | 88  | ND  | ND      | ND  | ND  | 1.23 | 4.9 | ND |
|                        | Sample 6 F | 86  | ND  | ND      | ND  | ND  | 1.45 | 3.9 | ND |
| Brand 5 discount zero  | Sample 1 F | 81  | 109 | 388     | ND  | 117 | 1.41 | 3.9 | ND |
|                        | Sample 2 F | 78  | 108 | 373     | ND  | 115 | 1.41 | 3.9 | ND |
|                        | Sample 3 F | 81  | 105 | 386     | ND  | 116 | 1.41 | 3.9 | ND |
|                        | Sample 4 F | 80  | 115 | 349     | ND  | 120 | 1.27 | 3.9 | ND |
|                        | Sample 5 F | 65  | 106 | 330     | ND  | 116 | 1.18 | 3.9 | ND |
|                        | Sample 6 F | 80  | 108 | 375     | ND  | 116 | 1.41 | 3.9 | ND |
| Brand 6 discount       | Sample 1 G | 104 | ND  | ND      | ND  | ND  | 4.05 | ND  | ND |
|                        | Sample 2 G | 98  | ND  | ND      | ND  | ND  | 3.86 | ND  | ND |
|                        | Sample 3 G | 101 | ND  | ND      | ND  | ND  | 3.95 | ND  | ND |
|                        | Sample 4 G | 100 | ND  | ND      | ND  | ND  | 3.50 | ND  | ND |
|                        | Sample 5 G | 96  | ND  | ND      | ND  | ND  | 3.95 | ND  | ND |
|                        | Sample 6 G | 105 | ND  | ND      | ND  | ND  | 4.14 | ND  | ND |
|                        | Sample 7 G | 95  | ND  | ND      | ND  | ND  | 2.14 | 1.9 | ND |
|                        | Sample 8 G | 94  | ND  | ND      | ND  | ND  | 3.68 | ND  | ND |
| Brand 6 discount light | Sample 1 G | 89  | 150 | Overlap | 264 | ND  | 2.73 | 1.0 | ND |
|                        | Sample 2 G | 88  | 139 | Overlap | 251 | ND  | 2.73 | ND  | ND |
|                        | Sample 3 G | 91  | 156 | Overlap | 249 | ND  | 2.64 | ND  | ND |
|                        | Sample 4 G | 86  | 144 | Overlap | 260 | ND  | 2.73 | ND  | ND |
|                        | Sample 5 G | 81  | 135 | Overlap | 247 | ND  | 2.59 | 1.9 | ND |
| Brand 6                | Sample 1 G | 95  | 154 | Overlap | 276 | ND  | 1.50 | 1.9 | ND |

|                         |            |     |     |         |     |    |      |     |    |
|-------------------------|------------|-----|-----|---------|-----|----|------|-----|----|
| discount zero           | Sample 2 G | 106 | 158 | Overlap | 271 | ND | 1.82 | 1.0 | ND |
|                         | Sample 3 G | 103 | 160 | Overlap | 265 | ND | 2.64 | ND  | ND |
|                         | Sample 4 G | 104 | 158 | Overlap | 266 | ND | 1.91 | 1.0 | ND |
|                         | Sample 5 G | 104 | 154 | Overlap | 264 | ND | 1.91 | 1.0 | ND |
| Brand 6 discount strong | Sample 1 G | 235 | ND  | ND      | ND  | ND | 2.59 | 3.9 | ND |
| Brand 7 discount        | Sample 1 G | 96  | ND  | ND      | ND  | ND | 4.09 | ND  | ND |
|                         | Sample 2 G | 93  | ND  | ND      | ND  | ND | 4.23 | ND  | ND |
|                         | Sample 3 G | 91  | ND  | ND      | ND  | ND | 4.14 | ND  | ND |
|                         | Sample 4 G | 95  | ND  | ND      | ND  | ND | 4.23 | ND  | ND |
|                         | Sample 5 G | 100 | ND  | ND      | ND  | ND | 4.14 | ND  | ND |
| Brand 7 discount light  | Sample 1 G | 84  | 130 | Overlap | 222 | ND | 3.27 | ND  | ND |
|                         | Sample 2 G | 83  | 139 | Overlap | 244 | ND | 3.32 | 1.0 | ND |
|                         | Sample 3 G | 80  | 139 | Overlap | 246 | ND | 3.05 | 1.0 | ND |
|                         | Sample 4 G | 81  | 133 | Overlap | 231 | ND | 3.09 | 1.0 | ND |
|                         | Sample 5 G | 81  | 143 | Overlap | 216 | ND | 2.91 | ND  | ND |
| Brand 8 strong          | Sample 1 G | 243 | ND  | ND      | ND  | ND | 2.95 | 7.8 | ND |
| Brand 9 strong          | Sample 1 G | 252 | ND  | ND      | ND  | ND | 1.73 | 2.9 | ND |

<sup>1</sup> G and F means that the samples were produced in Germany and France, respectively

<sup>2</sup> For the brand 1 light, brand 1 light without caffeine and brand 4 discount zero (containing small amount of citric acid), the doublet between 2.73 and 2.76 ppm was integrated while for the brand 1 zero, brand 2 zero and brand 5 discount zero, the multiplet between 3.03 and 3.11 ppm was integrated

# 1 Supporting information: NMR resonances of selected compounds in standard solutions and cola samples

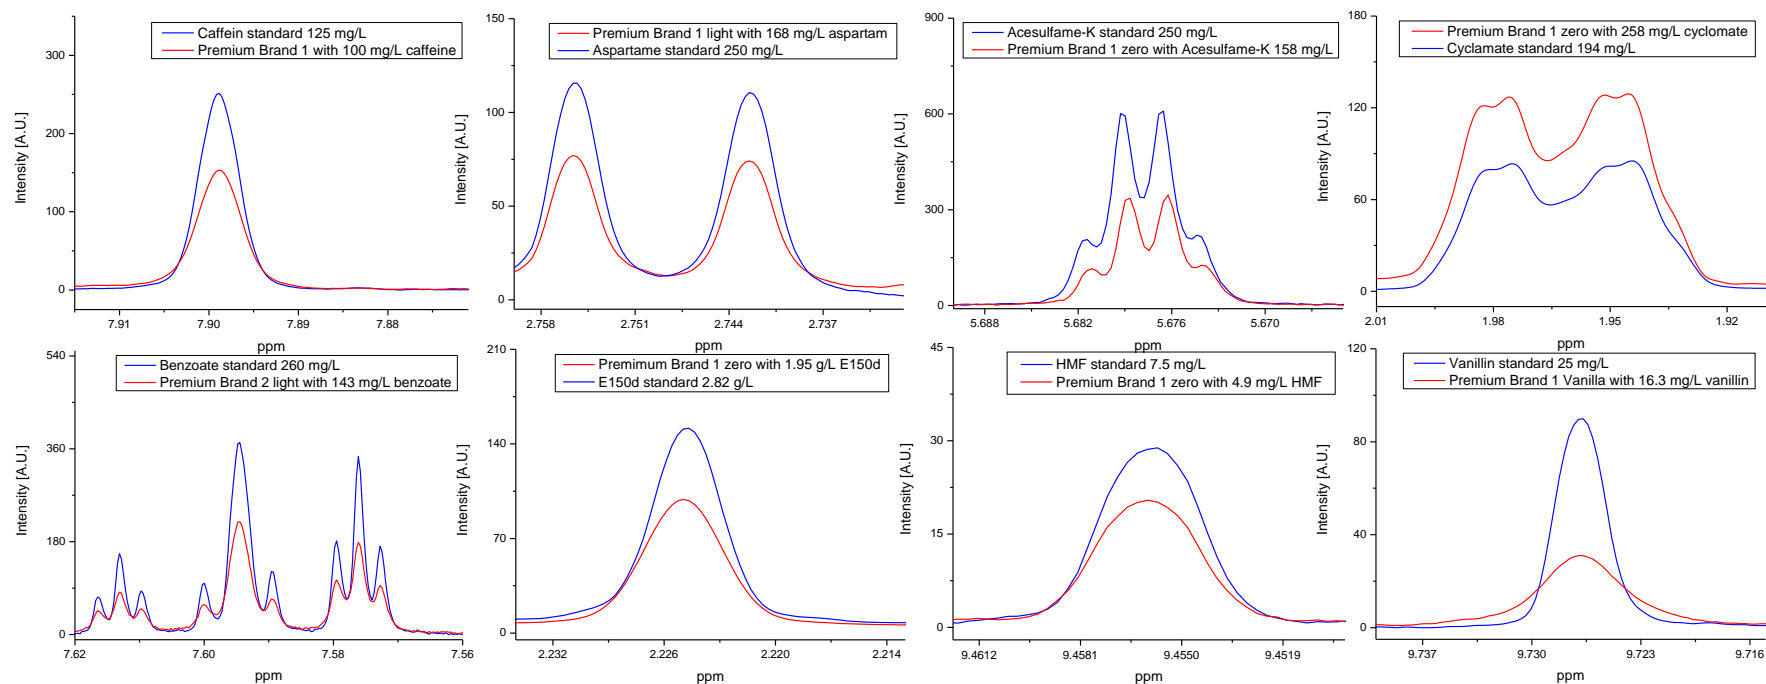

2
